# Supplementary material
Source: Springer Nature journal article supplement (https://www.springermedizin.de/resource/supplementary/12876_2011_698_MOESM1_ESM.pdf/9437514)
Supplement: MOESM1 [file 9437514]

Total numbers of papers retrieved on search (n=28)

Studies Excluded  
Reviews and only abstract (n=7)  
Relevant to treatment (n=2)

Potentially relevant studies identified for evaluation (n=19)

Studies Excluded  
Not relevant to APRI diagnosis (n=3)

Eligible studies identified for evaluation (n=16)

Studies Excluded  
Insufficient data (n=4)  
Duplication of data (n=1)  
Small sample size and mixed etiology (n=2)

Studies included in meta-analysis (n=9)
